# 1 **Intrinsic timescales of sensory integration for motion** 2 **perception**

3 Woochul Choi<sup>1,2</sup> & Se-Bum Paik<sup>1,2</sup> \*

4 *<sup>1</sup>Department of Bio and Brain Engineering, <sup>2</sup>Program of Brain and Cognitive Engineering, Korea Advanced*  
5 *Institute of Science and Technology, Daejeon 34141, Republic of Korea*

6 \*email: sbpaik@kaist.ac.kr

7

8 **A subject-specific process of accumulation of information may be responsible for variations in**  
9 **decision time following visual perceptions in humans. A detailed profile of this perceptual decision**  
10 **making, however, has not yet been verified. Using a coherence-varying motion discrimination task, we**  
11 **precisely measured the perceptual decision kernel of subjects. We observed that the kernel size**  
12 **(decision time) is consistent within subjects, independent of stimulus dynamics, and the observed**  
13 **kernel could accurately predict each subject's performance. Interestingly, the performance of most**  
14 **subjects was optimized when stimulus duration was matched to their kernel size. We also found that**  
15 **the observed kernel size was strongly correlated with the perceptual alternation in bistable conditions.**  
16 **Our result suggests that the observed decision kernel reveals a subject-specific feature of sensory**  
17 **integration.**

## 18 **Introduction**

19 Perceptual decision making is the act of choosing an option based on the evaluation of sensory evidence <sup>1</sup>.  
20 To understand how the brain translates the interpretation of sensory information into behavior, it is  
21 essential to study the mechanism by which this psychophysical judgment process occurs <sup>2-4</sup>. To address  
22 this issue, human behavior in visual tasks such as motion detection has been studied extensively <sup>2,5,6</sup>. In  
23 such studies, a net motion direction discrimination task has been frequently implemented with a dynamic  
24 random dot display and observers' response characteristics (i.e., reaction time, accuracy, decision  
25 confidence) were measured <sup>2,7-11</sup>. Thereafter, neurophysiological studies examined the relationship  
26 between neural activity patterns and psychophysical behavior in monkeys, revealing a strong correlation  
27 between the neuronal and behavioral data <sup>2,5,7,12</sup>. Similarly, computational models suggested that  
28 perceptual decision making arises through the integration of sensory information <sup>8,10,11</sup> and can be  
29 described by the diffusion-to-boundary process model <sup>9,13,14</sup>.

30         Alternatively, it has been reported that perceptual decisions are affected not only by the sensory  
31 information, but also by other factors such as attention, task difficulty, and the feedback of the decision  
32 results <sup>1,15,16</sup>. In addition, a number of studies reported substantial variation across the observers'  
33 behavior, even in an identical stimulus condition. This inter-individual variability in perceptual behavior,  
34 often ignored or considered noise, has been recently studied more carefully using brain imaging  
35 techniques and individual variability appears to be related to local structure or connectivity of the brain  
36 <sup>17,18</sup>. Further research is required, as the notion that inter-individual differences in perceptual decisions  
37 should be considered structural variations of neural circuits as opposed to mere statistical noise remains  
38 under debate.

39         A recent study on the perceptual decision making process during a motion perception task <sup>11</sup>  
40 suggested that subjective decision times reflects different profiles of evidence accumulated by each  
41 individual and showed that the bounded evidence accumulation model<sup>13,14</sup> could predict subject behavior  
42 from their observed decision time. This suggests that inter-individual variability in perceptual decision  
43 time may be due to the synthesis of crucial information of the decision variable and the threshold in  
44 individuals, and may be of particular importance for those investigating the origin of inter-individual  
45 variability in perceptual behavior.

46         Given this, we hypothesized that if perceptual decisions reflect individual characteristics of each  
47 brain circuit, then the time course of sensory integration, known as the "decision kernel", will be

48 consistent within a subject, independent of instantaneous stimulus dynamics. We anticipate that this  
49 intrinsic decision kernel size may vary across subjects as the decision threshold varies and this may be an  
50 origin of inter-individual variability in perceptual behavior. Therefore, we suggest that wide variation in  
51 perceptual behavior originates from the intrinsic characteristics of brain circuits of individuals for sensory  
52 integration and that this should be considered as crucial information of subject-specific characteristics of  
53 perception.

54 To validate our hypothesis, we performed a series of psychophysics experiments using a  
55 coherence-varying motion discrimination task. We measured a decision kernel in each individual by  
56 estimating the response-triggered-average of a stimulus, while varying the motion coherence of the  
57 stimulus. We observed a very consistent profile of the decision kernel in each subject, independent of  
58 stimulus dynamics. Observed kernel size or decision time largely varied across subjects and accurately  
59 predicted the inter-individual variability in responses. Additionally, we found that the decision time-  
60 matched motion stimulus maximized the correct ratio of individual performance. Furthermore, we found  
61 that subjects' characteristics of illusory motion perception was highly correlated with the observed  
62 intrinsic decision kernel. Therefore, our results suggest that an intrinsic, perceptual decision kernel is a  
63 critical factor to study sensory perception and that the inter-individual variability can be considered as a  
64 subject-specific trait from this decision kernel.

65

## 66 **Results**

### 67 **Perceptual decision making during coherence-varying motion discrimination task**

68 To characterize individual motion perception sensory integration, we designed a coherence-varying  
69 motion discrimination task. For a motion stimulus, random dots were positioned in a circular annulus  
70 and a certain portion of the dots were shifted to new rotated positions (clockwise or counter-clockwise) in  
71 the next movie frame. To generate a random pattern of motion <sup>10</sup>, the portion of rotating dots (motion  
72 coherence,  $c$ ) and a rotational direction (sign of  $c$ ) were set to fluctuate randomly over time (see the  
73 Methods section for details). During the task, subjects were asked to report the direction of rotation as  
74 soon as they perceived a motion (Figs. 1a and b). To compare the perceptual decision characteristics  
75 under different conditions of stimulus dynamics, we varied the frequency of motion fluctuation (Fig. 1c,  
76 see Supplementary Fig. S1) from 0.15 Hz ( $F_1$ ; lowest) to 1.24 Hz ( $F_4$ ; highest).

77 To quantify the subject's perceptual decision kernel, we measured the average stimulus pattern  
78 that triggered perceptual responses using the reverse correlation method<sup>19-21</sup>. We captured the stimulus  
79 pattern within the 10 second window prior to the subject reporting the direction of the perceived motion  
80 (Fig. 1d). Then, the sampled stimulus patterns were averaged together, creating the response-triggered  
81 average stimulus (RTA). The RTA measured in each subject allowed us to find the temporal profile of  
82 sensory integration for a perceptual decision, which we defined as the decision kernel of the subject (Fig.  
83 1e). The shape of the RTA showed a positive peak before the response, which then decreased to negative  
84 value and gradually reached zero (see Supplementary Fig. S2 for control analysis). We found that an  
85 individual RTA curve fit well to a superposition of two alpha functions, similar to the quantification of  
86 the temporal receptive field structure of retinal neurons<sup>22</sup>.

$$87 \quad RTA(t) = A_1 \left(\frac{t}{\tau_1}\right)^n e^{-\frac{(n-1)t}{\tau_1}} - A_2 \left(\frac{t}{\tau_2}\right)^n e^{-\frac{(n-1)t}{\tau_2}} \quad [1]$$

88 We focused on the parameter  $T_0$ , i.e. the timing that the RTA first crosses the zero-coherence, for the  
89 profile of this decision kernel because this value reveals the size of the temporal window for effective  
90 sensory integration for decision making.

91 We first compared the observed RTA curves across different stimulus dynamics conditions and  
92 found that  $T_0$  values (the kernel sizes) were consistent across stimulus conditions, even though the  
93 frequency of motion fluctuation changed 8-fold (Fig. 1f, see Supplementary Fig. S3). We confirmed that  
94 the difference of  $T_0$  under different stimulus conditions was insignificant for our sample ( $N = 40$ ) ( $p=0.91$ ,  
95  $F(3, 156) = 0.17$ , one-way ANOVA). This suggests that the time course of motion integration within an  
96 individual is fairly consistent and independent of the stimulus dynamics. We then averaged the RTAs  
97 from all four conditions to obtain an average motion decision kernel for each subject. In the averaged  
98 RTA, we found that the kernel size  $T_0$  varied noticeably from 1 to 4 sec across individuals (Fig.1g, see also  
99 Supplementary Fig. S4).

100 Using the observed kernels, we tried to predict the subjects' perceptual response to the stimulus  
101 in Figure 1. From a linear convolution of the stimuli pattern and the observed decision kernel, we were  
102 able to successfully reproduce the perceptual response pattern and, in particular,  $N_{\text{switch}}$ , defined as the  
103 number of perceptual switches, in each subject (Fig. 2a, see Supplementary Fig. S5). Our model predicted  
104 that the  $N_{\text{switch}}$  of the subject would be inversely related to the observed kernel size  $T_0$ , confirmed by our  
105 observed response data (Fig. 2b and c). In addition, our model predicted that subjects with small  $T_0$   
106 would have larger  $N_{\text{switch}}$  as stimulus frequency increases, while subjects with large  $T_0$  would have fewer

107 changes in  $N_{\text{switch}}$  across different stimulus frequency conditions. We measured the  $\Delta N_{\text{switch}}$  of each subject  
108 (Fig. 2b) and confirmed that  $\Delta N_{\text{switch}}$  is inversely related to the observed kernel size  $T_0$ , as our model  
109 predicted (Fig. 2d).

110 If the individual decision kernel size determines the number of perceptual switching during the  
111 task, we may then assume that the accuracy and the response time of each subject are also governed by  
112 the kernel size  $T_0$ . For instance, an individual with small  $T_0$  may better detect the fast change of rotational  
113 direction than an individual with large  $T_0$ . To validate this hypothesis, we defined the motion  
114 discrimination accuracy and the response time using the cross-correlation between the stimulus and  
115 response patterns (Fig. 2e). As expected, the kernel size  $T_0$  was negatively correlated with accuracy (Fig.  
116 2f). Also, the response time of a subject was strongly correlated with  $T_0$  (Fig. 2g). These results suggest  
117 that our RTA could precisely measure the time course of perceptual decisions and the size of the  
118 temporal window  $T_0$  for sensory integration. We then expected that the observed subject-specific decision  
119 kernel may be responsible for inter-individual variability in perceptual behavior and might enable us to  
120 predict individual performances under a given stimulus condition.

121

### 122 **Kernel-matched stimulus optimizes motion discrimination performance**

123 Based on the observations across subjects of various timescales of sensory integration, we predicted that  
124 the performance of subjects might be optimized by matching the stimulus to the observed decision kernel  
125 profile. To validate this hypothesis, we designed our next experiment to have random dots generate a  
126 motion with a fixed direction (clockwise or counter-clockwise). The motion coherence was set at a  
127 constant level (5%), but the motion duration varied from 0.5 to 5 seconds. Subjects were asked to observe  
128 the stimulus until the end of the movie and then to report the motion direction perceived at the last  
129 moment (Fig. 3a). If the accumulation of evidence is governed by the observed kernel, integrated motion  
130 information will increase as the stimulus duration increases up to  $T_0$ , and will decrease when the stimulus  
131 duration becomes longer than  $T_0$  (Fig. 3b, top). Therefore, the accuracy of the perception will be the  
132 highest when the stimulus duration matches  $T_0$  (Fig. 3b, bottom). Our experimental results confirmed that  
133 the correct ratio did not simply increase as the stimulus duration increased, rather they showed a peak at  
134 a certain value of stimulus duration in more than half of the subjects (Fig. 3c, subjects 3 and 4). This  
135 suggests that there exists an optimal size of evidence accumulation for making the correct decision (see  
136 Supplementary Fig. S7).

137 To examine whether the optimal perception occurs when stimulus duration is matched to the  
138 intrinsic decision kernel size, we fit the correct ratio curve to an alpha function. Then we estimated  $T_{opt}$ ,  
139 the stimulus duration that induces the maximum correct ratio in each subject and compared it with the  
140 individual kernel size,  $T_0$ . As expected, subjects'  $T_{opt}$  was strongly correlated to  $T_0$  (Fig. 3d,  $r = 0.65$ ,  
141  $p=0.0020$ ,  $N=20$ , Pearson's correlation coefficient). We observed that the value of  $T_{opt}$  varied significantly  
142 across subjects, according to their decision kernel sizes. (Fig. 3e, left, orange and blue). As a result, when  
143 the stimulus duration was given as a single fixed value, each subject would show a noticeably different  
144 performance.

145 When we normalized the time axis of each subject's performance curve with their intrinsic kernel  
146 size  $T_0$ , the performance curves instead showed a similar trend, which increased toward 1 ( $T_{stim} = T_{opt}$ ) and  
147 gradually decreased after (Fig. 3e, right, Fig. 3f, see Supplementary Fig. S7 for details). As a result, in the  
148 normalized time scale, the population average showed a peak around 1 (Fig. 3f, red solid line), suggesting  
149 that most subjects showed the best correct ratio when the stimulus duration matched their intrinsic  
150 decision kernel size. Taken together, these results confirm that sensory integration in an individual is  
151 governed by the observed non-linear decision kernel profile and the performance of a perceptual task  
152 may also vary, depending on the difference between the kernel size and stimulus duration.

153

### 154 **Illusory motion perception and motion decision kernel**

155 Thus far, our decision kernel has been estimated from apparent motion signals. We further examined the  
156 notion that the observed intrinsic kernel may predict subjects' behavior for illusory motion perception.  
157 Previous studies have shown that random dots scattered in an annulus induce an illusory rotational  
158 motion<sup>23,24</sup> and that the perceived motion direction varies spontaneously between clockwise and counter-  
159 clockwise, showing a typical bistable perception dynamic<sup>23,25,26</sup>. We hypothesized that this periodic  
160 alternation in bistable perception might be also governed by the intrinsic decision kernel of subjects. To  
161 validate this hypothesis, we performed another experiment in which subjects were asked to report the  
162 direction of the perceived motion while completely random dot signals (coherence,  $c = 0$ ) were shown  
163 (Fig. 4a). Consistent with previous studies, most subjects reported illusory rotational motion in this  
164 condition and the direction of perceived motion was periodically altered, spontaneously<sup>23</sup>. To quantify  
165 temporal features of this bistable perception, we measured the phase duration,  $\tau$ , of illusory motion in  
166 one direction. Similar to a previous report<sup>27</sup>, we fit the measured  $\tau$  values of a subject to a log-normal

167 distribution and estimated the peak value  $\bar{\tau}$ , as a representation of individual dynamics of bistable  
168 perception.

169 The bistable phase duration, or  $\bar{\tau}$ , remained consistent within an individual, but varied across  
170 individuals. For example, subject 5 (Fig. 4b, top) showed relatively faster phase switching than subject 6  
171 (Fig. 4b, bottom), but the phase durations were quite periodic and the distribution of  $\tau$  values were fit  
172 well to log-normal distributions in both cases (Fig. 4c). The peak value,  $\bar{\tau}$ , varied greatly, from 0.5 to 8  
173 seconds across subjects ( $\bar{\tau} = 2.51 \pm 1.43$  seconds, see Supplementary Fig. S8). However, subjects who had a  
174 long intrinsic decision time,  $T_0$ , also tended to have slow switching dynamics with a large  $\bar{\tau}$ , while  
175 subjects who had a short intrinsic decision time tended to have fast switching dynamics with a small  $\bar{\tau}$ .  
176 (Fig. 4d). As predicted, we observed a strong positive correlation between the values of  $\bar{\tau}$  and  $T_0$ , (Fig. 4e,  
177  $r = 0.71$ ,  $p = 1.58 \times 10^{-7}$ , Pearson correlation coefficient). This strong correlation between the observed  
178 kernel size and the switching dynamics in bistable perception suggests that the observed intrinsic  
179 decision time of sensory integration may govern the perceptual response to illusory motions, as well as  
180 apparent motions.

181

## 182 Discussion

183 Previous studies of motion perception have suggested that perceptual decisions arise through an  
184 accumulation of evidence, thus this process can be characterized by the drift-diffusion model<sup>13,14</sup>. In this  
185 bounded-evidence-accumulation model, the inter-individual variability in perceptual decisions is  
186 frequently explained by various conceptual parameters such as a decision boundary threshold, evidence  
187 accumulation rate, and choice bias<sup>10,11</sup>. The model can partially predict observed experimental results  
188 such as individual accuracy of perception. However, it still remains unclear what physical variables may  
189 indeed represent those decision parameters and if any of them are intrinsically consistent to characterize  
190 individual variance of subject behavior. Our finding of an intrinsic decision kernel suggests an alternative  
191 description of the drift-diffusion model and provides direct evidence of intrinsic decision time that is  
192 subject-specific and stimulus independent. Our results also suggest that the inter-individual variability in  
193 perceptual decisions may originate from this intrinsic decision timescale and therefore may be considered  
194 a predictable trait.

195 We were able to demonstrate that the observed sensory integration kernel can accurately predict  
196 diverse characteristics of perceptual behavior. In our first experiment, the number of perceived motion

197 switching under the same stimulus conditions varied across the subjects (Fig. 2b) and this number was  
198 inversely related to the observed subject's kernel size (Fig. 2c). Moreover, it was noticeable that subjects  
199 with shorter kernel size could detect the motion direction better than the subjects with the longer kernel  
200 size when the motion coherence of the stimulus fluctuated with different frequencies (Fig. 2f,  
201 Supplementary Fig. S6). Regardless of the stimulus frequency, subjects with the shorter kernel perceived  
202 the change of motion direction better than those with the longer kernel, potentially because a shorter  
203 integration kernel may induce less sampling error in integrating noisy coherent signals than a longer  
204 sampling kernel and therefore may be advantageous for encoding highly varying stimuli (see  
205 Supplementary Fig. S6d). Another noticeable result is the strong correlation between the reaction time  
206 and the observed kernel size. In our observations, the reaction time and the kernel size were almost  
207 identical; thus the reaction time appeared very consistent within a subject and diverse across subjects,  
208 similar to the decision kernel profile (Fig. 2g and Supplementary Fig. S6). In accordance with the previous  
209 observation of the relationship between reaction time and performance accuracy, this suggests that the  
210 reaction time of a subject provides information of individual's decision process <sup>11</sup>.

211 Contrary to anecdotal observations, we demonstrated that longer duration of constant motion  
212 stimulus did not enhance subject performance. Indeed, when the stimulus contains a constant motion  
213 with a fixed direction, a longer duration of stimulus would generate more information accumulated in  
214 the correct direction of the decision variable, therefore the drift-diffusion model predicts a higher correct  
215 ratio of decision. In contrast, our observed decision kernel has a highly non-linear structure with a  
216 positive peak and a negative overshoot thereafter. Thus, stimulus information provided within the size of  
217 the positive part of the kernel would enhance the performance, while a longer stimulus duration may  
218 induce negative drift and degrade the decision performance (Fig. 3b). As predicted by the observed  
219 kernel, our experiments showed that there exist an optimal stimulus duration for each subject and the  
220 subject's performance became worse when the stimulus duration became longer than this length.  
221 Therefore, our second experiment suggests that sensory integration is not a simple linear accumulation,  
222 but can be predicted by observed non-linear decision kernel within each subject  $T_0$  (Fig. 3e, f). This result  
223 raises an important issue; often, human psychophysics experiments are performed with fixed parameters  
224 of stimulus for all subjects and the responses are averaged across subjects to ignore inter-individual  
225 variation. Under these conditions, each subject will make a distinct decision behavior by their intrinsic  
226 kernels and the analysis could be misguided if we ignore the subject-specific traits. For example, if we  
227 simply average all the subject responses from a fixed timescale of stimuli, the averaged result may not



228 show any clear trend (Fig. 3e, left). But, if we consider the subject-specific traits by kernel size so that the  
229 stimulus parameters were matched to the individual integration time, a common tendency of responses  
230 might be properly observed (Fig. 3e, right). This suggests that psychophysics experiments should be  
231 designed and performed carefully with a consideration of subject-specific differences.

232         Lastly, we showed that the observed kernel could predict the temporal features of bistable  
233 perception. The bistable perception in our third experiment is of a dynamic illusory motion, where  
234 subjects perceive a rotational motion of quasi-consistent duration from a totally random signal. For  
235 decades, it has been of interest to find the underlying mechanism of the bistable perception<sup>28-31</sup>,  
236 particularly on the origin of periodic alternation of perceived states. It has been reported that the bistable  
237 switching of frequencies from different types of stimuli are correlated in each subject, suggesting a  
238 common mechanism of bistable alternation<sup>32-34</sup>. Based on our results demonstrating a strong correlation  
239 between bistable switchings and the intrinsic decision time of subjects, we may argue that the observed  
240 decision kernel also governs the sensory process for the bistable condition of illusory perception. Under  
241 these assumptions, neuroimaging data in bistable perception studies may provide an insight into the  
242 origin of subject-specific dynamics of motion integration. For example, it has been reported that the  
243 structural characteristics of bilateral superior parietal lobes (SPL) were significantly correlated with the  
244 perceptual switching frequency for rotating structure-from-motion stimulus<sup>17,18,35</sup>. In the functional part  
245 of the brain, both pharmacological studies and several computational models suggested that cross-  
246 inhibition levels between the two activities modulate the switching frequency of the bistable perception  
247<sup>36-40</sup>. If these factors are relevant to the observed kernel profile, it may be that individual difference of the  
248 observed kernel originate from the structural difference of the higher brain regions and the temporal  
249 scale of the decision kernel may reflect distinct inhibition level in each brain structure. Future studies  
250 should be conducted to confirm these notions.

251         In conclusion, we were able to verify an individual profile of sensory integration kernel from our  
252 controlled random dot stimulus and showed that human perceptual behaviors are governed by this  
253 kernel. The size of the kernel predicted an optimal stimulus duration for correct perceptual decision and  
254 the temporal characteristics of response under bistable conditions. Overall, our findings suggest that  
255 perceptual decisions arise in the intrinsic timescale of the sensory integration process.

256

257

## 258 **Methods**

### 259 **Participants**

260 Forty-five subjects (23 females, 22 males, ranging in ages from 20–29 years, with normal or corrected  
261 normal vision) were enrolled in this study. All experimental procedures were approved by the  
262 Institutional Review Board (IRB) of KAIST (KH2017-05) and all procedures were carried out in  
263 accordance with approved guidelines. Written informed consent was obtained from all subjects.

### 265 **Display and visual stimulus**

266 Visual stimuli were presented on an LCD monitor screen (DELL U3014, 29.8 inches, 2560 × 1600, 60 Hz  
267 resolution) for all experiments. Subjects were positioned 160 cm away from the monitor and were asked  
268 to report their perception of the stimulus using buttons on the keyboard. At each frame of the stimulus,  
269 black dots were distributed in a circular annulus. The inner and outer radii of the annulus were at a 3.5  
270 degree and 5 degree visual angle, respectively, from the center of the screen. The individual dots were 5  
271 minute of solid angle in diameter and the dot density was set to 5 dots/deg<sup>2</sup>. The refresh rate of motion  
272 for each frame was 20 Hz; thus, each frame lasted for 50 ms and refreshed with the next frame. A black  
273 cross appeared at the center of the screen and each subject was asked to fix his or her eyes on the cross  
274 during the experiment. Stimulus conditions were optimized based on the results from preliminary trials  
275 and previous references<sup>23</sup>. All visual stimuli were generated with MATLAB Psychtoolbox 3.0.

276 In the first experiment (Figs. 1, 2, and 4), subjects viewed rotating dots on the screen and were asked  
277 to report the direction of rotation by pressing the arrow keys on the keyboard whenever they perceived a  
278 change in the rotational direction of the dots (the right arrow key for clockwise rotation, the left arrow  
279 key for counter-clockwise rotation, and the down arrow key for mixed or ambiguous rotation). Subjects  
280 pushed the down arrow key for mixed/ambiguous rotation infrequently (mixed perception duration was  
281 less than 0.15% on average).

282 This experiment was comprised of five conditions. In one condition, the motion coherence level of  
283 the stimulus was set to 0 for a duration of 60 seconds (Fig. 4). In this condition, all of the dots in every  
284 frame were randomly located in the annulus and did not produce any global rotational motion. In the  
285 other four conditions, the motion coherence level of the stimulus,  $S(t)$ , was set to fluctuate over time (Figs.  
286 1 and 2). In these conditions,  $S(t)$  was calculated from the following equation:

$$287 \quad S(t) = A_1 \int_{t=0}^{60} C_0(t) g(t - \tau) d\tau$$

288 where  $C_0(t)$  is a random number from the normal distribution of  $N(0, 0.05)$  and  $g(t)$  is a Gaussian filter:

289

$$g(t) = \frac{1}{\sigma_{filter}\sqrt{2\pi}} e^{\frac{-t^2}{2\sigma_{filter}^2}}$$

290 with four different  $\sigma_{filter}$  values of 100, 200, 400, and 800 ms.  $A_1$  is a constant to normalize  $S(t)$ , so that the  
291 sums of absolute amplitude under the four different conditions are the same (average = 8%). The sign of  
292  $S(t)$  determined the rotation direction (clockwise for positive, counter-clockwise for negative values). At  
293 each frame, dots of  $S(t)$  were rotated by an angle  $\theta_{rotate} = \pm 5^\circ$  in the next frame. The detailed statistics of  
294  $S(t)$  are shown in supplementary Fig. S1.

295 In the first experiment, each subject performed a total of 80 sequences of the trials: 64 trials (16  
296 trials $\times$ 4 frequency conditions) of a coherence-varying motion condition and 16 trials of a random motion  
297 condition ( $S(t)=0$ ), with random assignment of the sequence of conditions. In the second experiment (Fig.  
298 3), the dots were set to have a fixed rotational direction, clockwise (CW) or counter-clockwise (CCW),  
299 which lasted for  $T_{stim}$ . During  $T_{stim}$ , the coherence level was fixed at 5%. After the visual stimulation,  
300 subjects were asked to report the rotational direction of the stimulus perceived at the last moment of the  
301 stimulus. Stimulus duration,  $T_{stim}$ , was randomly chosen from the pool [0.5, 1, 1.5, 2, 3, 5] seconds (Fig.  
302 3a). For the second experiment, each subject performed 50 perceptual decisions under 6 conditions of  
303 varying stimulus duration (300 total trials), with random assignment of the sequence of the conditions.

304

## 305 Analysis

306

### 307 Motion integration kernel: Response-Triggered Average

308 To extract a subject's motion integration kernel, we first measured the time point at which the perceptual  
309 switch was reported,  $t_{switch}$ . In a single frequency condition,  $F_i$  of motion coherence fluctuation, we  
310 extracted the stimulus pattern 10 seconds prior to every  $j^{\text{th}}$  response of switching time,  $t_{switch=j}$  and  
311 averaged these response-triggering stimulus patterns as follows:

312

$$RTA_{F_i} = \sum_{switch=j}^{N_{switch}} \frac{sgn(transition) S_{F_i}(t_{switch=j} - 10 \sim t_{switch=j})}{N_{switch}}$$

313 To obtain the average integration kernel of a subject, the RTAs from four different frequency  
314 conditions were summed:

315

$$RTA_{average} = \sum_{i=1}^4 RTA_{F_i} / 4$$

316 To minimize the possibility that the long and short RTAs came from the difference in switching  
317 numbers during the experiment, we generated a control response in which the responses were shuffled at

318 random times, but with the same distribution of inter-response-interval. Then, the power of the kernel,  
319  $P(t) = \Sigma (RTA(t)^2)$  between the actual observed RTA and control RTA were compared (see Supplementary  
320 Fig. S2 for details).

321  
322 **Response prediction with observed kernel**  
323 To predict a perceptual response to a given stimulus, we took a linear convolution of the stimulus pattern  
324 with the individual motion integration kernel:

$$325 \quad L(t) = S(t)_{Fi} \otimes RTA_{Average}$$

326 where  $\otimes$  denotes the convolution and  $L(t)$  is the linear response to the stimulus.

327 We assumed that the response switches when the integrated response  $L(t)$  exceeds the threshold  
328 value,  $L_{th}$  were as following:

$$329 \quad R(t) = \begin{cases} +1(CW) & \text{when } L(t) \geq L_{th} \\ -1(CCW) & \text{when } L(t) \leq -L_{th} \\ R(t-1) & \text{when } -L_{th} < L(t) < L_{th} \end{cases}$$

330 and the threshold value  $L_{th}$  was calculated from the observed kernel as:

$$331 \quad L_{th} = \sum_{t=-10}^0 RTA(t)^2$$

332 To examine the goodness-of-prediction, the cross-correlation between the  $R_{Predicted}(t)$  and the  $R_{Observed}$   
333  $(t)$  was calculated (see Supplementary Fig. S5). As a control, the perceptual response was switched at  
334 random times, while maintaining the same inter-response-interval of the actual response.

335  
336 **Estimation of perceptual switching of motion**

337 During 60 seconds of a single trial, the subject's switch responses (CW to CCW; CCW to CW) were  
338 counted (Fig. 2a) at each of the four frequency conditions. We fit the relationship between the  $N_{switch}$  and  
339  $T_0$  to  $N_{switch} = \frac{C}{T_0}$ , and  $C$  was estimated as 25.7 for the observed response and 20.1 for the response  
340 predicted from the estimated kernel (Fig. 2c). Also,  $\Delta N_{switch} = N_{switch;Fi+1} - N_{switch;Fi}$  was calculated and fit to  
341  $\Delta N_{switch} = \frac{C_1}{T_0} + C_2$  (Fig. 2d).

342  
343 **Cross-correlation between motion detection accuracy and response time**

344 To examine the motion detection performance and response time of a subject's behavior, the cross-  
345 correlation between the stimulus  $S(t)$  and the response  $R(t)$  pair was calculated (Fig. 2e). Here,  $S(t)$   
346 contains the motion coherence level at each frame and  $R(t)$  contains the simultaneously perceived state

347 (+1 for clockwise rotation, -1 for counter-clockwise rotation, and 0 for mixed rotation). The cross-  
348 correlation  $CC(t)$  between the  $S(t)$  and  $R(t)$  was calculated (Fig. 2e and Supplementary Fig. S6). Accuracy  
349 of the motion detection was defined as the maximum value of  $CC(t)$  at  $t = 0 \sim 5$  seconds and response time  
350 was defined as the time lag at which  $CC(t)$  reaches a maximum value (see Fig. 2e and Supplementary Fig.  
351 S6 for details).

352

### 353 **Perceptual response to a motion of different duration**

354 In the experiment with a short visual stimulation (Fig. 3), the trial was counted as correct if the reported  
355 direction was matched the stimulus rotational direction. The correct ratio and the stimulus duration  
356 curves were fit to an alpha function:

$$357 \quad CR(T_{stim}) = C_1 \left( \frac{T_{stim}}{\tau} \right)^n e^{-(n-1)\frac{T_{stim}}{\tau}} + C_2$$

358 The average coefficient of determination,  $R^2$ , was 0.5885 (see examples in Fig. 3c, and in Supplementary  
359 Fig. S7a).

360 In each curve of fitted correct ratio, the stimulus duration was estimated when the correct ratio  
361 reached maximum,  $T_{opt}$  (Fig. 3c). The correlation between  $T_{opt}$  and kernel size  $T_0$  was calculated to  
362 determine if motion integration is governed by the observed kernel. Next, we investigated the general  
363 trend of each subject's behavior to determine whether the average correct ratio was maximized at  $T_0$  (see  
364 Supplementary Fig. S7). From the fitted correct ratio curve, we Z-scored the correct ratio and then  
365 rescaled the  $T_{stim}$  with respect to the subject's kernel size,  $T_0$ . After we obtained the normalized correct  
366 ratio curve, we averaged all subject curves. As a control, we rescaled each subject curve with shuffled  $T_0$   
367 of each subject. See Fig. 3e, f, and Supplementary Fig. S7 for details.

368 Twenty four subjects participated in the experiment. The data from four subjects was discarded  
369 from the analysis, because their RTA and correct ratio distributions did not fit the population average,  
370 leaving a total  $N = 20$ .

371

### 372 **Perceptual responses to illusory motion in bistable condition**

373 For the condition  $S(t) = 0$  (Fig. 4), phase duration  $\tau$  was defined as the time interval between each switch  
374 of the perceived state. For each 60-second trial, the initial 10 seconds of data were excluded for the  
375 adaptation stage and the lower 1% and upper 5% of  $\tau$  data points were excluded. Measured phase  
376 durations were converted into a cumulative density function, then fit to a log-normal distribution as:

$$377 \quad F_x = \frac{1}{2} \left[ 1 + \operatorname{erf} \left( \frac{\ln x - \mu}{\sigma \sqrt{2}} \right) \right],$$

378 where

379 
$$\operatorname{erf}(x) = \frac{2}{\sqrt{\pi}} \int_0^x e^{-t^2} dt$$

380 The log-normal distribution is a logarithm form of the normal distribution; thus, the peak of the  $\tau$   
381 distribution is analogous to the mean of the normal distribution. Therefore,  $\bar{\tau}$  was used as the  
382 representative figure of perceptual switching distribution and  $\bar{\tau}$  was then estimated from the fitted  
383 function as:

384 
$$\bar{\tau} = e^{\mu - \sigma^2}$$

385 Fitting was performed using the MATLAB function 'NonlinearLeastSquares'.

386

387 **Statistical test**

388 P-values and the type of statistical test used in the analysis are denoted in each figure caption and in the  
389 main text. We used a one-way ANOVA with Bonferroni correction to examine individual differences across  
390 the frequency conditions. Pearson's correlation was used for the analysis of all linear correlations. We used  
391 a random shuffling method for comparison between the control and observed data, as described in the  
392 main text and figure legends.

## 393 References

- 394 1. Heekeren, H. R., Marrett, S. & Ungerleider, L. G. The neural systems that mediate human  
395 perceptual decision making. *Nat. Rev. Neurosci.* **9**, 467–479 (2008).
- 396 2. Newsome, W. T., Britten, K. & Movshon, J. Neuronal correlates of a perceptual decision. *Nature*  
397 **341**, 52–54 (1989).
- 398 3. Heekeren, H. R., Marrett, S., Bandettini, P. A. & Ungerleider, L. G. A general mechanism for  
399 perceptual decision-making in the human brain. *Nature* **431**, 859–862 (2004).
- 400 4. Heekeren, H. R., Marrett, S., Ruff, D. A., Bandettini, P. A. & Ungerleider, L. G. Involvement of  
401 human left dorsolateral prefrontal cortex in perceptual decision making is independent of response  
402 modality. *Proc. Natl. Acad. Sci.* **103**, 10023–10028 (2006).
- 403 5. Mikami, A., Newsome, W. T. & Wurtz, R. H. Motion selectivity in macaque visual cortex. I.  
404 Mechanisms of direction and speed selectivity in extrastriate area MT. *J. Neurophysiol.* **55**, 1308–  
405 1327 (1986).
- 406 6. Fredericksen, R. E., Verstraten, F. A. J. & Van De Grind, W. A. Temporal integration of random  
407 dot apparent motion information in human central vision. *Vision Res.* **34**, 461–476 (1994).
- 408 7. Shadlen, M. N., Britten, K. H., Newsome, W. T. & Movshon, J. A. A computational analysis of the  
409 relationship between neuronal and behavioral responses to visual motion. *J. Neurosci.* **16**, 1486–  
410 510 (1996).
- 411 8. Gold, J. I. & Shadlen, M. N. The Neural Basis of Decision Making. *Annu. Rev. Neurosci.* **30**, 535–  
412 574 (2007).
- 413 9. Mazurek, M. E. A Role for Neural Integrators in Perceptual Decision Making. *Cereb. Cortex* **13**,  
414 1257–1269 (2003).
- 415 10. Zylberberg, A., Fetsch, C. R. & Shadlen, M. N. The influence of evidence volatility on choice,  
416 reaction time and confidence in a perceptual decision. *Elife* **5**, 1–31 (2016).
- 417 11. Kang, Y. H. R., Petzschner, F. H., Wolpert, D. M. & Shadlen, M. N. Piercing of Consciousness as  
418 a Threshold-Crossing Operation. *Curr. Biol.* **27**, 2285–2295.e6 (2017).
- 419 12. Gold, J. I. & Shadlen, M. N. Neural computations that underlie decisions about sensory stimuli.  
420 *Trends Cogn. Sci.* **5**, 10–16 (2001).
- 421 13. Ratcliff, R. & McKoon, G. The Diffusion Decision Model: Theory and Data for Two-Choice Decision  
422 Tasks. *Neural Comput.* **20**, 873–922 (2008).
- 423 14. Wagenmakers, E., van der Maan, H. L. J. & Grasman, R. P. P. P. An EZ-diffusion model for  
424 response time. *Psychon. Bull. Rev.* **14**, 3–22 (2007).
- 425 15. Ridderinkhof, K. R. The Role of the Medial Frontal Cortex in Cognitive Control. *Science.* **306**, 443–  
426 447 (2004).
- 427 16. Ullsperger, M. & von Cramon, D. Y. Neuroimaging of Performance Monitoring: Error Detection and  
428 Beyond. *Cortex* **40**, 593–604 (2004).
- 429 17. Kanai, R. & Rees, G. The structural basis of inter-individual differences in human behaviour and  
430 cognition. *Nat. Rev. Neurosci.* **12**, 231–242 (2011).
- 431 18. Kanai, R., Bahrami, B. & Rees, G. Human Parietal Cortex Structure Predicts Individual Differences  
432 in Perceptual Rivalry. *Curr. Biol.* **20**, 1626–1630 (2010).
- 433 19. Borghuis, B. G. *et al.* The motion reverse correlation (MRC) method: *J. Neurosci. Methods* **123**,

- 434 153–166 (2003).
- 435 20. Ringach, D. & Shapley, R. Reverse correlation in neurophysiology. *Cogn. Sci.* **28**, 147–166  
436 (2004).
- 437 21. Caspi, A., Beutter, B. R. & Eckstein, M. P. The time course of visual information accrual guiding  
438 eye movement decisions. *Proc. Natl. Acad. Sci.* **101**, 13086–13090 (2004).
- 439 22. Chichilnisky, E. J. & Kalmar, R. S. Functional asymmetries in ON and OFF ganglion cells of  
440 primate retina. *J. Neurosci.* **22**, 2737–47 (2002).
- 441 23. Jain, S. Performance Characterization of Watson Ahumada Motion Detector Using Random Dot  
442 Rotary Motion Stimuli. *PLoS One* **4**, e4536 (2009).
- 443 24. Rose, D. & Blake, R. Motion perception: from phi to omega. *Philos. Trans. R. Soc. Lond. B. Biol.*  
444 *Sci.* **353**, 967–980 (1998).
- 445 25. Necker, L. Observations on some remarkable optical phænomena seen in Switzerland; and on an  
446 optical phænomenon which occurs on viewing a figure of a crystal or geometrical solid. *London*  
447 *Edinburgh Philos. Mag. J. Sci.* **1**, 329–337 (1832).
- 448 26. Miller, G. A. The Trill Threshold. *The Journal of the Acoustical Society of America* **22**, 637 (1950).
- 449 27. Zhou, Y. H., Gao, J. B., White, K. D., Merk, I. & Yao, K. Perceptual dominance time distributions in  
450 multistable visual perception. *Biol. Cybern.* **90**, 256–263 (2004).
- 451 28. Levelt, W. J. M. On binocular rivalry. (*Institute for Perception, Soesterberg, The Netherlands*)  
452 (1965).
- 453 29. Blake, R. A neural theory of binocular rivalry. *Psychol. Rev.* **96**, 145–167 (1989).
- 454 30. Knapen, T., Brascamp, J., Pearson, J., van Ee, R. & Blake, R. The role of frontal and parietal brain  
455 areas in bistable perception. *J. Neurosci.* **31**, 10293–10301 (2011).
- 456 31. Brascamp, J. W., Blake, R. & Knapen, T. Negligible fronto-parietal BOLD activity accompanying  
457 unreportable switches in bistable perception. *Nat. Neurosci.* **18**, 1672–1678 (2015).
- 458 32. Carter, O. L. & Pettigrew, J. D. A common oscillator for perceptual rivalries? *Perception* **32**, 295–  
459 305 (2003).
- 460 33. Sheppard, B. M. & Pettigrew, J. D. Plaid motion rivalry: Correlates with binocular rivalry and  
461 positive mood state. *Perception* **35**, 157–169 (2006).
- 462 34. Pressnitzer, D. & Hupé, J.-M. Temporal Dynamics of Auditory and Visual Bistability Reveal  
463 Common Principles of Perceptual Organization. *Curr. Biol.* **16**, 1351–1357 (2006).
- 464 35. Kanai, R., Carmel, D., Bahrami, B. & Rees, G. Structural and functional fractionation of right  
465 superior parietal cortex in bistable perception. *Curr. Biol.* **21**, R106–R107 (2011).
- 466 36. van Loon, A. M. *et al.* GABA Shapes the Dynamics of Bistable Perception. *Curr. Biol.* **23**, 823–827  
467 (2013).
- 468 37. Blake, R. & Logothetis, N. K. Visual competition. *Nat. Rev. Neurosci.* **3**, 13–21 (2002).
- 469 38. Tootell, R. B. H. *et al.* Visual motion aftereffect in human cortical area MT revealed by functional  
470 magnetic resonance imaging. *Nature* **375**, 139–141 (1995).
- 471 39. Moreno-Bote, R., Rinzel, J. & Rubin, N. Noise-induced alternations in an attractor network model  
472 of perceptual bistability. *J. Neurophysiol.* **98**, 1125–1139 (2007).
- 473 40. Noest, A. J., van Ee, R., Nijs, M. M. & van Wezel, R. J. A. Percept-choice sequences driven by



474 interrupted ambiguous stimuli: A low-level neural model. *J. Vis.* **7**, 10 (2007).

475

## 476 **Supplementary information**

477 Supplementary figures and legends are available in **Supplementary Information**.

478

## 479 **Acknowledgements**

480 This research was supported by the Basic Science Research Program through the National Research  
481 Foundation of Korea (NRF), funded by the Ministry of Science, ICT & Future Planning (NRF-  
482 2016R1C1B2016039, NRF-2016R1E1A2A01939949) (to S.P.).

483

## 484 **Author contributions**

485 W.C. designed and performed the psychophysics experiments, developed software for analysis, analyzed  
486 data, and wrote the manuscript. S.P. conceived and designed the project, directed the experiments and  
487 analysis, and wrote the manuscript.

488

## 489 **Competing interest declaration**

490 Authors declare no competing interests.

Figure 1.

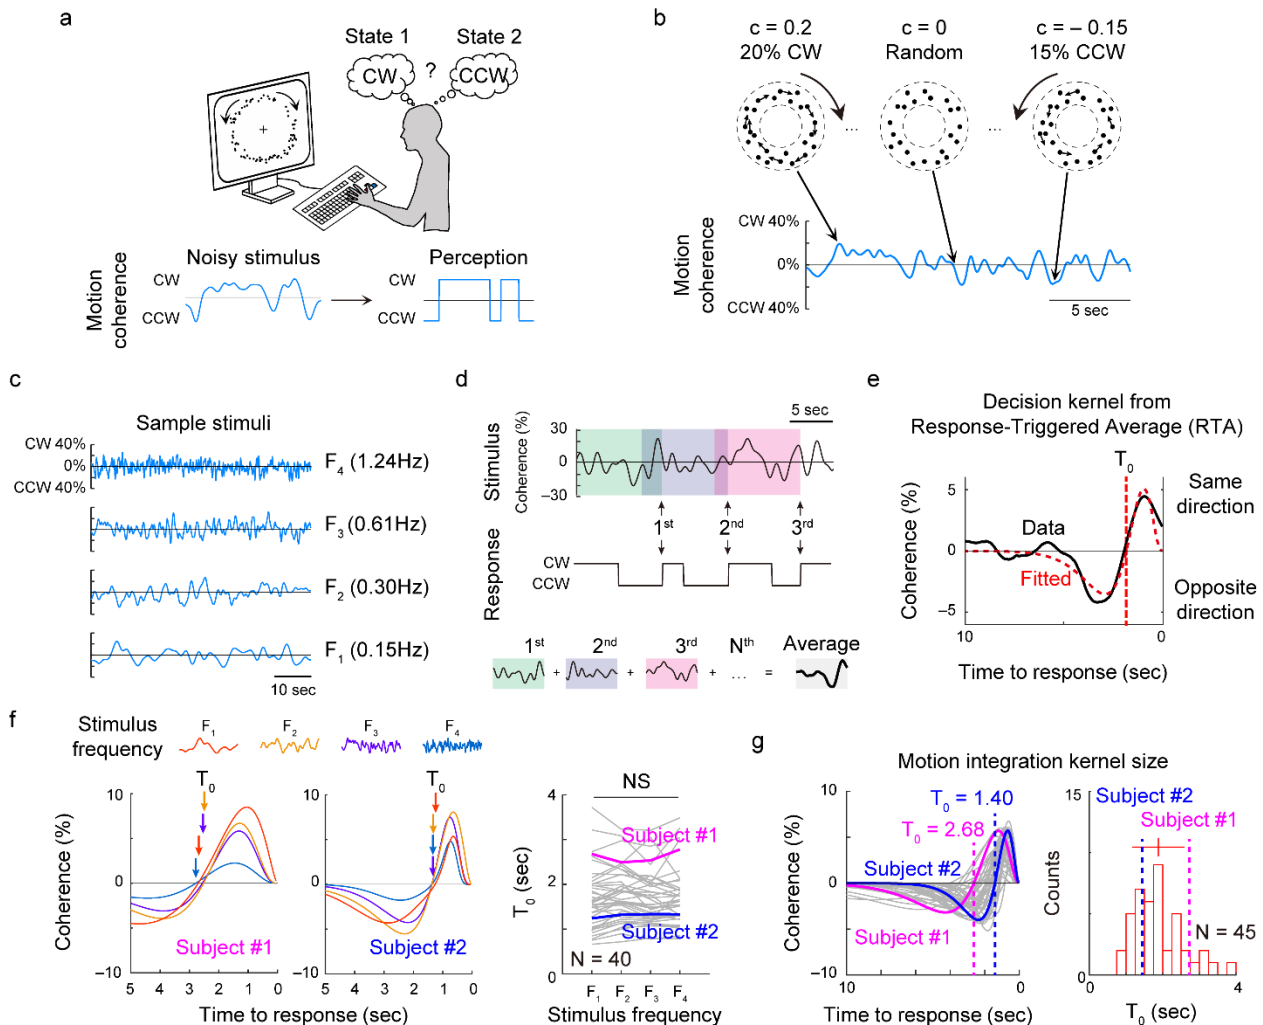

491

492 **Fig. 1. Measurement of evidence accumulation time course using coherence-varying motion**  
 493 **discrimination task** (a) Dots positioned at random locations in a circular annulus were given as a visual  
 494 stimulus. Subjects were asked to report the direction of perceived rotational motion by keyboard press. The  
 495 positions of dots were updated at every 50 ms and the perceptual alternations between the two directions  
 496 were recorded (b) A constant portion (motion coherence,  $c$ ) of dots were controlled to rotate either clockwise  
 497 or counter-clockwise. (c) Motion coherence was controlled to fluctuate with four different temporal  
 498 frequencies, from 0.15Hz ( $F_1$ ) ~ 1.24Hz ( $F_4$ ). (d) At each response of motion perception (black arrows for  
 499 CW switches), the preceding stimulus pattern was recorded and averaged. (e) From the observed  
 500 Response-Triggered Average (RTA) kernel, the time point at which the curve becomes zero was defined  
 501 as  $T_0$ , the decision time window. (f) RTAs under four different stimulus conditions.  $T_0$  was fairly consistent  
 502 under these conditions (One-way ANOVA,  $p=0.91$ ,  $F(3, 156) = 0.17$ ). (g) Fitted motion integration kernel of  
 503 all subjects. Two sample RTAs were highlighted for comparison. Subject 1 (magenta) showed a longer  
 504 kernel of  $T_0 = 2.68$  sec than subject 2 (blue) with a kernel of  $T_0 = 1.40$  sec.  $T_0$  varied from approximately 1-  
 505 4 sec across subjects.

Figure 2

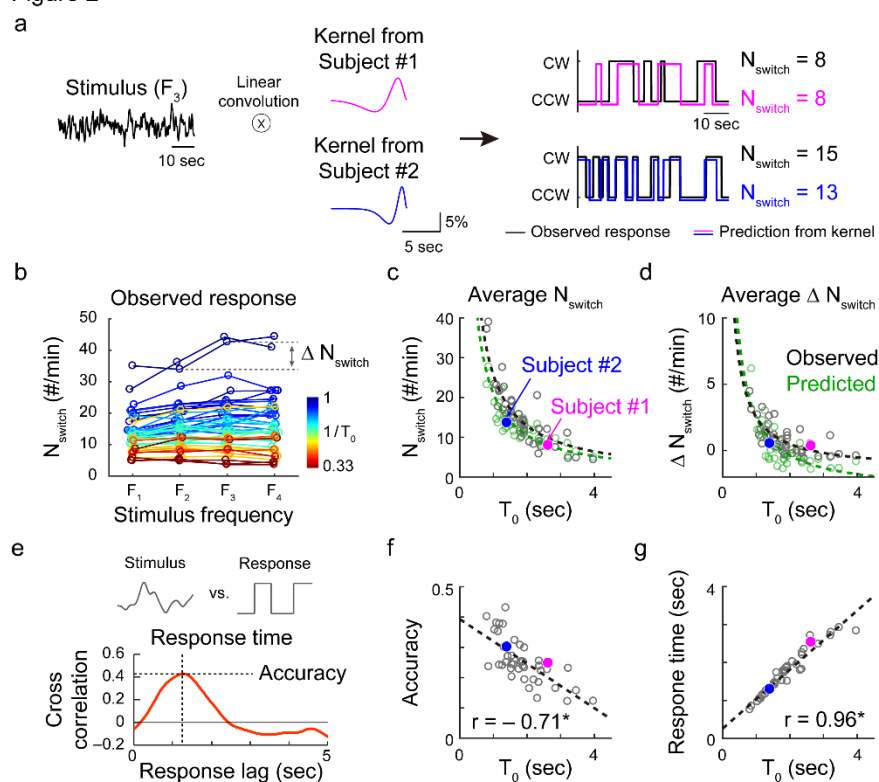

506

507 **Fig. 2. Observed motion integration kernel predicts subject's perceptual responses.** (a) Prediction of  
 508 perceptual responses with observed kernels. Stimulus pattern was convoluted with the observed kernel  
 509 and discretized (See Methods for details). The number of perceptual switches,  $N_{\text{switch}}$ , was counted from  
 510 the estimated response pattern. This prediction matched the observed responses for a given stimulus well  
 511 (See Supplementary Figure S5 for details). (b)  $N_{\text{switch}}$  and  $\Delta N_{\text{switch}}$  of subject responses were observed to  
 512 compare with the prediction from the kernel. Each color represents data from different subjects of various  
 513  $T_0$ . (c, d) Average  $N_{\text{switch}}$  was inversely related to  $T_0$  in both the model (kernel) prediction and observed data.  
 514  $\Delta N_{\text{switch}}$  was also inversely related to  $T_0$  in the observed data, as predicted by the model. Colored filled  
 515 circles show subject #1 and #2. (e) Performance accuracy and response time of subjects were defined as  
 516 the maximum of cross-correlation and the corresponding time lag, respectively. (f, g) The  $T_0$  values of each  
 517 subject were negatively correlated with the average perceptual accuracy ( $r = -0.71$ ,  $p < 6.0 \times 10^{-8}$ ) and  
 518 positively correlated with the response time ( $r = 0.96$ ,  $p < 6.7 \times 10^{-25}$ , Pearson's correlation coefficient). See  
 519 Supplementary Fig. S6 for details.

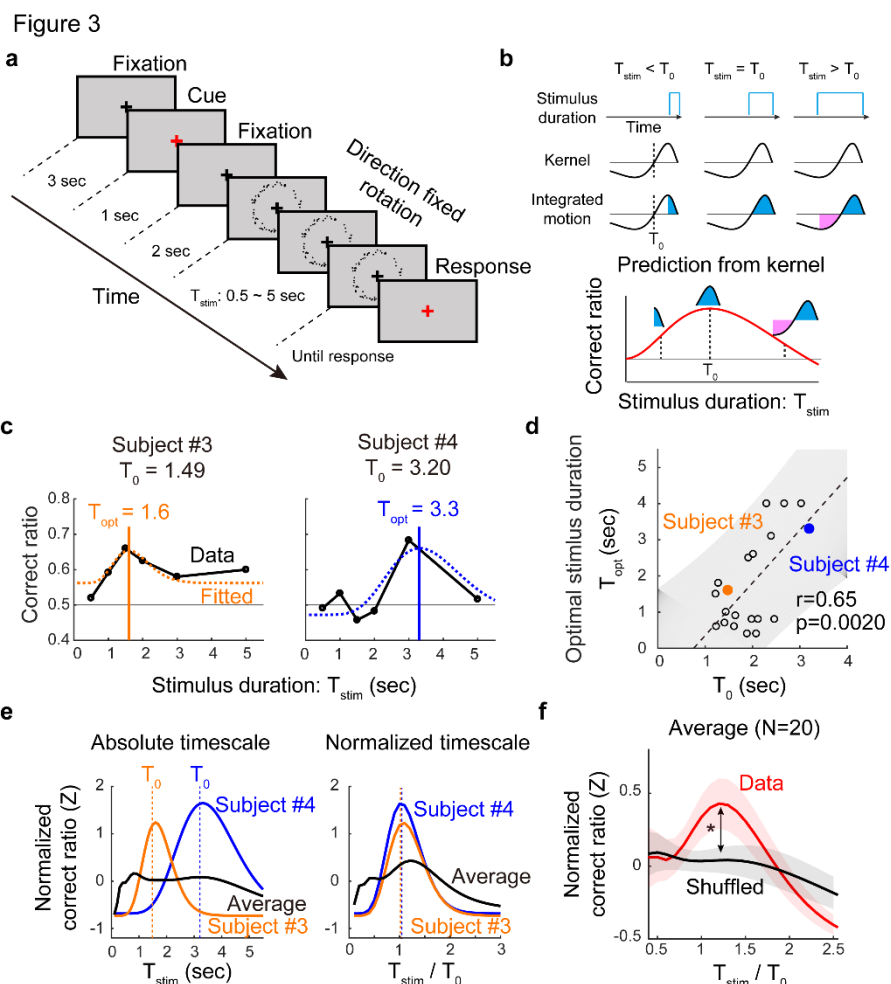

520

521 **Fig. 3. Kernel-size matched stimulus duration optimizes sensory perception.** (a) Experimental design  
 522 for finding an optimal value of stimulus duration. The stimulus was a constant motion of 5% coherence with  
 523 fixed rotational direction and the duration was varied from 0.5 ~ 5 seconds. Subjects were instructed to  
 524 report the direction of perceived motion at the end of the stimulus. (b) Correct ratio predicted from the  
 525 observed kernel. Our model predicts that the integrated motion evidence would be maximized when  $T_{stim}$   
 526 matches  $T_0$ , consequently the subject performance would show the maximum correct ratio when stimulus  
 527 duration is closest to  $T_0$ . (c) Optimal duration value at the peak correct ratio significantly varied across  
 528 subjects. Two sample performance curves and their fitted value of optimal duration,  $T_{opt}$ , were shown. (d)  
 529 Correlation between  $T_{opt}$  and  $T_0$ . Optimal stimulus duration was strongly correlated with the observed kernel  
 530 size  $T_0$  ( $r=0.65$ ,  $p=0.0020$ , Pearson's correlation coefficient). Colored filled circles show subject #3 and #4.  
 531 (e) In an absolute time scale, the correct ratio curves from different subjects were noticeably different (left).  
 532 However, in a timescale normalized by subjects'  $T_0$  value, the curves appeared to have a similar pattern  
 533 with a peak near 1 (right) (f) The averaged performance curves of normalized timescale increased as  
 534 stimulus duration increased toward 1 ( $T_{stim} = T_{opt}$ ) and then gradually decreased. The maximum correct ratio  
 535 appeared at  $T_{stim} / T_0 = 1.2$  and was significantly higher than the control, in which  $T_0$  values were shuffled  
 536 (black). See Supplementary Fig. S7 for details.

Figure 4

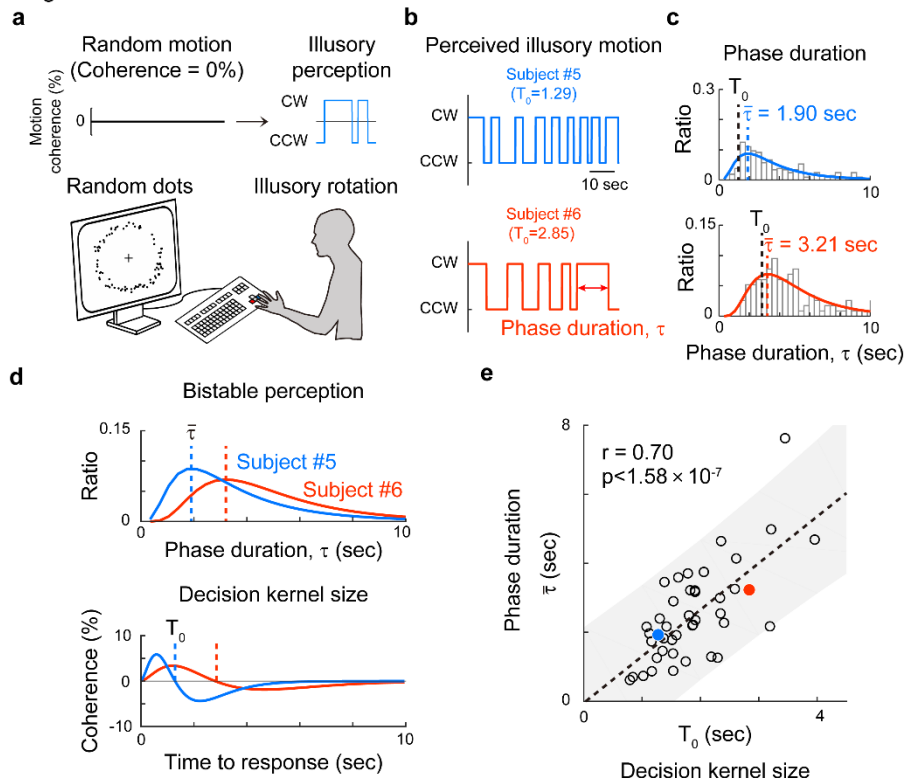

537

538 **Fig. 4. Motion integration kernel predicts the periodic alternation in bistable perception** (a) Random  
 539 dot kinetics inducing illusory motion of bistable perception. Every dot is randomly distributed in each time  
 540 frame, yielding no net motion. Most observers, however, perceived a rotating motion of the dots. (b, c)  
 541 Sample responses from two subjects with a short (1.29 seconds, blue) and long (2.85 seconds, orange)  $T_0$   
 542 of integration kernel shown. In the bistable perception of illusory motion, subject 5 showed relatively faster  
 543 alternation (top, blue) than subject 6 (bottom, orange) during 60 seconds of stimulation. The interval  
 544 between two consecutive perceptual alternations was defined as the phase duration,  $\tau$ . In each subject, the  
 545 observed value of  $\tau$  was fitted to a log-normal distribution and the peak value was denoted as  $\bar{\tau}$ . (d) The  
 546 bistable phase duration  $\bar{\tau}$  (top) and the size of decision kernel (bottom) of subject 5 and subject 6 were  
 547 shown for comparison. (e) Correlation between the  $\bar{\tau}$  and the size of the decision kernel. A strong positive  
 548 correlation was observed ( $r = 0.71$ ,  $p = 1.58 \times 10^{-7}$ ).

## Supplementary material

# 1 **Intrinsic timescales of sensory integration for motion** 2 **perception**

3 Woochul Choi<sup>1,2</sup> & Se-Bum Paik<sup>1,2</sup> \*

4 *<sup>1</sup>Department of Bio and Brain Engineering, <sup>2</sup>Program of Brain and Cognitive Engineering, Korea Advanced*  
5 *Institute of Science and Technology, Daejeon 34141, Republic of Korea*

6 \*email: sbpaik@kaist.ac.kr

7

8 **This PDF file includes:**

9 Figs. S1 to S8

## Supplementary material

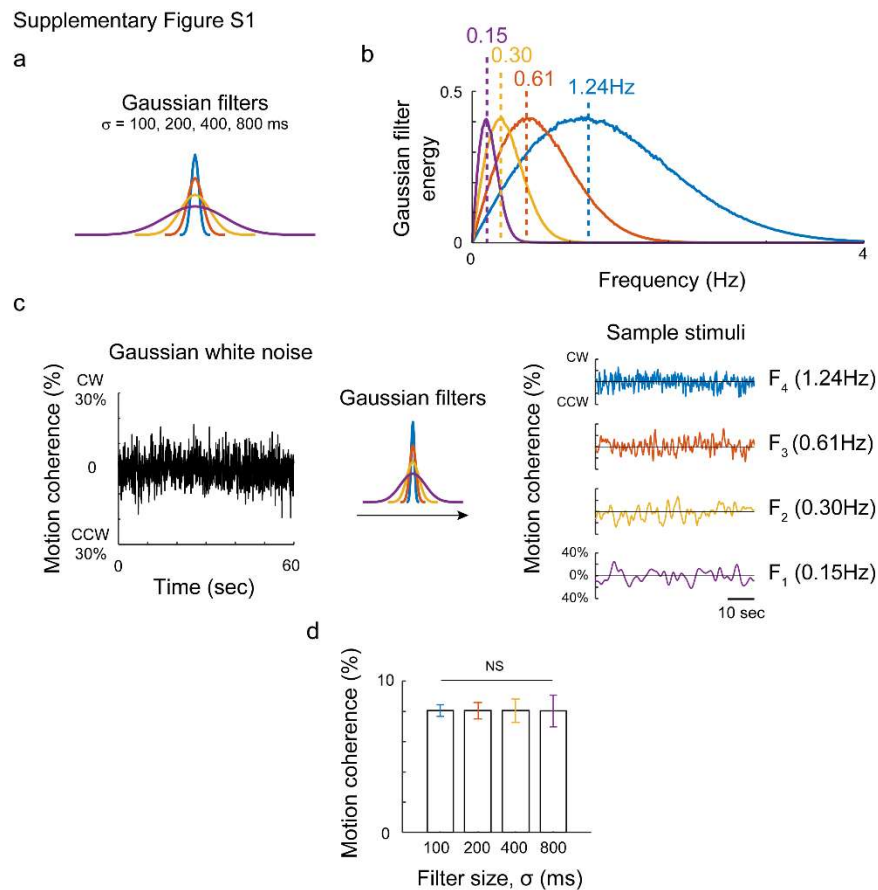

10

### 11 **Fig. S1. Statistics of fluctuating motion pattern**

12 (a) Preparation of visual motion stimulus. Four Gaussian filters were used to create a time-varying motion  
13 coherence of four different frequencies. (b) The energy of the Gaussian filters in frequency space. Each  
14 filter demonstrated a peak in the frequency-energy curve, which denotes the frequency for the highest  
15 energy. The peak appeared at 0.15, 0.30, 0.61, and 1.24 Hz when the stimulus was filtered with 800, 400,  
16 200, and 100 ms Gaussian filters, respectively. (c) Gaussian white noise was generated in every frame  
17 (left) and convoluted with a Gaussian filter with different width. (d) In these four conditions, the average  
18 coherence was normalized to have the same value (8%, N=1000 simulations, one-way ANOVA,  $p=0.91$ ).  
19 Note that the average motion strength was equivalent in all conditions, thus the four conditions had, on  
20 average, the same task difficulty.

## Supplementary material

Supplementary Figure S2

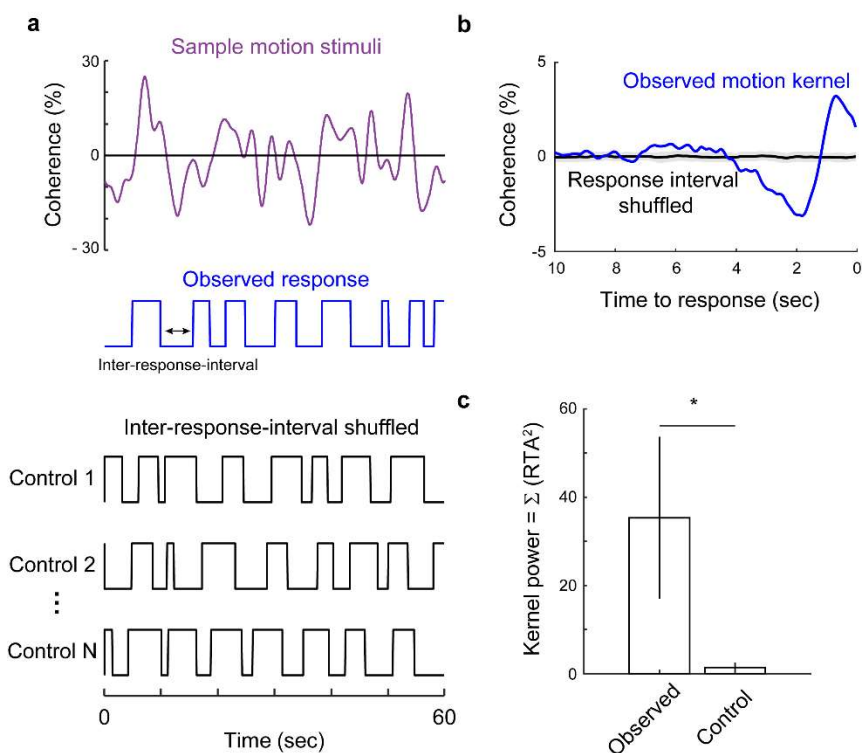

21

### 22 **Fig. S2. Observed motion integration kernel and a control analysis**

23 To reject the hypothesis that the observed kernel originated from the stimulus characteristics or from the  
24 individual variance of frequent/sporadic responses, we designed a control analysis. (a) With the stimulus  
25 used in the experiment (top, purple) and the observed response (middle, blue), we made a shuffled  
26 response maintaining the same inter-response-interval of the response (bottom, black). (b) We extracted  
27 the RTA from the observed response (blue) and control response (black). The observed kernel showed a  
28 significant peak in the curve, while no peaks were found in the control RTA kernel. Shaded area denotes  
29 the standard deviation of control RTA. (c) The control RTA from the same number of responses did not  
30 show a meaningful structure. The kernel power, defined as the sum of the squared RTA, was significantly  
31 higher in the observed RTA ( $p < 1.49 \times 10^{-15}$ , paired t-test,  $N = 43$ ) than in the control.



## Supplementary material

Supplementary Figure S3

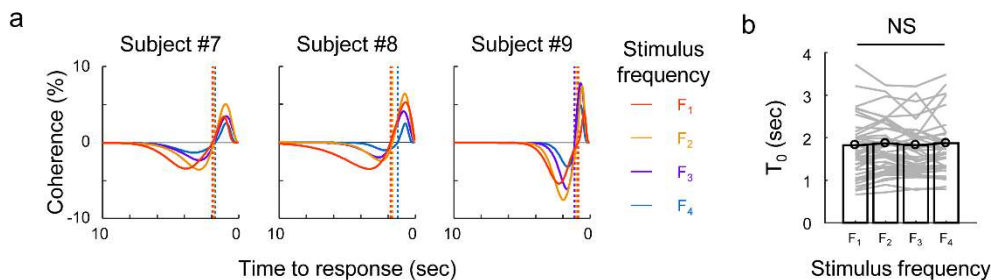

### 33 Fig. S3. Integration kernels under four different frequency conditions

34 (a) Sample kernels observed from three subjects under four different conditions of stimulus frequency.  $T_0$ ,  
35 the zero-crossing point of the fitted kernel under four conditions are shown in dashed lines. (b) As shown  
36 in the Fig. 1f, a one-way ANOVA demonstrated that the  $T_0$  values were not significantly different in the  
37 four stimulus conditions ( $F(3,156) = 0.17, p=0.9143$ ).

38  
39  
40  
41

Supplementary Figure S4

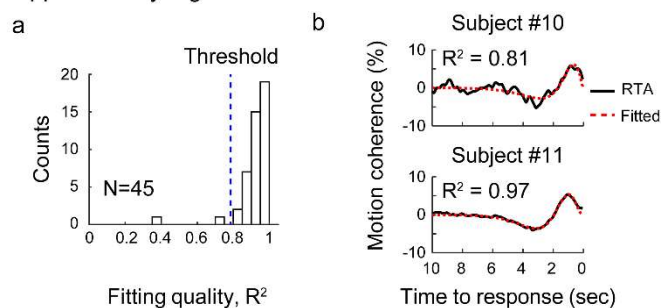

### 43 Fig. S4. Detailed motion kernel fitting

44 (a) Goodness of fit of the observed kernel. The kernel was extracted for each subject (Fig. 1f) and the  
45 histogram of the coefficient of determination,  $R^2$ , was plotted ( $N=45$ ). Most subjects showed a high  $R^2$  ( $R^2$   
46  $> 0.8$ ) but two subjects showed poor fitting result ( $R^2 < 0.8$ ), and were therefore discarded from any  
47 further analysis. (b) Sample kernel curves and fit results. The most poorly fit subject is shown in the top  
48  $R^2 > 0.8$  and the most well-fit subject kernel ( $R^2 = 0.97$ ) is shown at the bottom.

## Supplementary material

Supplementary Figure S5

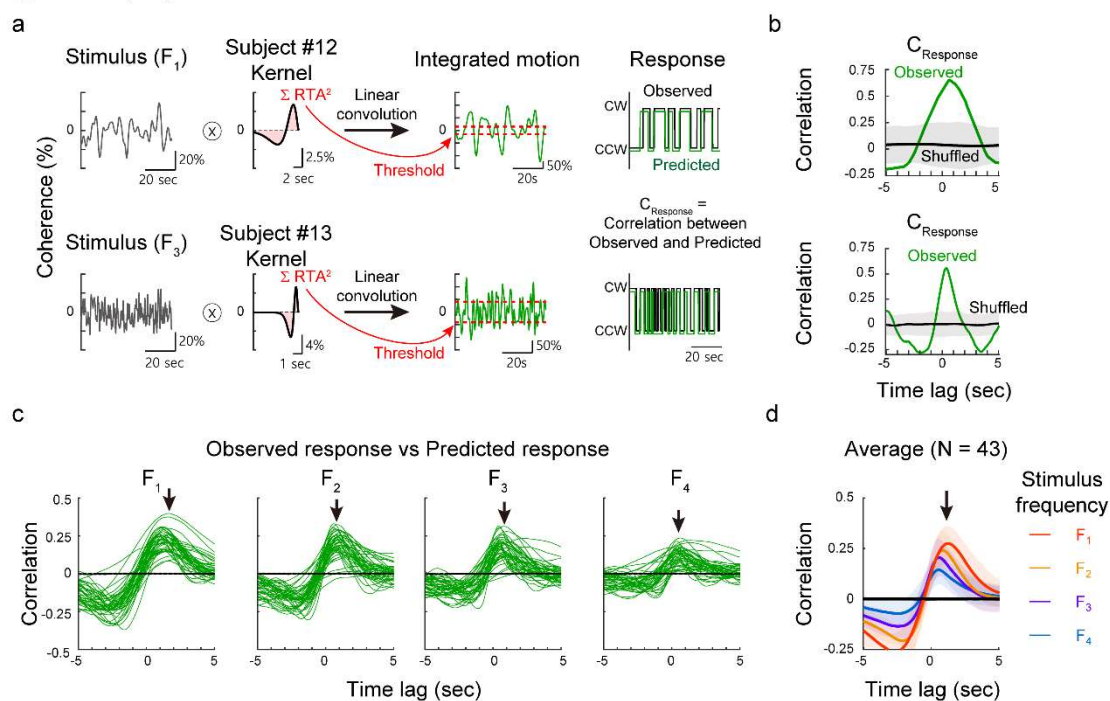

49

50 **Fig. S5. Perceptual responses predicted from the linear convolution between stimulus and**  
 51 **observed kernel**

52 (a) Two sample individual response predictions shown. First, the stimulus pattern used in the experiment  
 53 was linearly convoluted with each subject's average kernel (left). As a result, a predicted response curve  
 54 was obtained (middle). We set a threshold value from the square sum of the kernel (red dashed line, see  
 55 Methods for details), and assumed that the simulated response is switched if the linear response exceeds the  
 56 threshold. We calculated a cross-correlation between the observed data (black lines) and simulated a  
 57 perceptual response (green lines). (b) The model successfully replicated the observed response, which  
 58 was confirmed by the high correlation value (green lines). Correlations of the time-shuffled response data  
 59 was also calculated as a control (black lines). Shaded areas denotes the standard deviation of the cross-  
 60 correlation. (c) Cross-correlation of the model and observed data under four frequency conditions. Each  
 61 line indicates the individual simulations. Significant peaks (black arrows) in the correlation curve showed  
 62 that individual kernels can fairly well predict the response to any of the given stimuli. (d) Average cross-  
 63 correlation of the model and observed data. Each line denotes the mean correlation curve from four  
 64 stimulus conditions and the shaded area shows the standard deviation.

## Supplementary material

Supplementary Figure S6

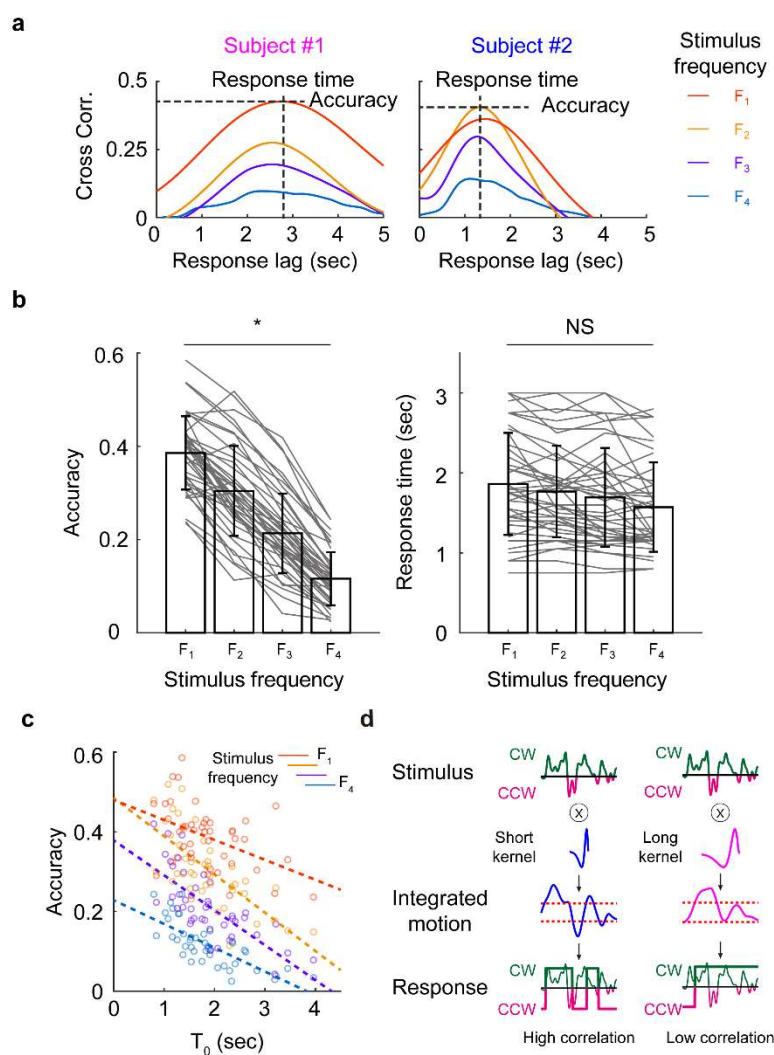

65

### 66 Fig. S6. Correlation between the motion detection behavior and kernel window size

67 (a) Two subjects' cross-correlation curves between the stimulus and perceptual response pattern were  
 68 shown. The cross-correlation between the stimulus pattern and perceptual response was measured (Fig.  
 69 2e) under the four stimulus conditions ( $F_1 \sim F_4$ ). The maximum amplitude of the curve revealed the accuracy  
 70 of the responses; the response time was defined as the time point at which the correlation curve reaches  
 71 the maximum value. (b) On average, accuracy decreased as the stimulus frequency increased ( $p <$   
 72  $1.21 \times 10^{-34}$ ,  $F(3, 168) = 89.49$ ), but the response time was stable under four different stimulus conditions  
 73 ( $p=0.15$ ,  $F(3, 168) = 1.8$ ). Estimated response time matched to the observed decision kernel size,  $T_0$  (Figs.  
 74 1f and 2g) (c) The accuracy of subjects under four different stimulus conditions. In all four stimulus  
 75 conditions, a significant negative correlation was found between the  $T_0$  and the accuracy of the motion  
 76 detection. ( $r = -0.46, -0.71, -0.74, -0.75$ ;  $p < 0.0022, p < 8.70 \times 10^{-8}, p < 1.98 \times 10^{-8}, p < 5.69 \times 10^{-9}$ ;  
 77 under stimulus  $F_1, F_2, F_3$  and  $F_4$  conditions, respectively, Pearson's correlation coefficient, left panel). (d) A  
 78 possible mechanism for the strong correlation between the performance accuracy and  $T_0$ . Given a stimulus  
 79 (top), each subject integrates the stimulus with their intrinsic kernel. As a result, subjects with a short kernel  
 80 (blue) would integrate the stimulus with a short time window and the integrated motion would change quickly

## Supplementary material

81 (middle). Thus, the response would show a high correlation to the given stimulus. However, subjects with  
 82 a long kernel integrate the stimulus with large time window (magenta), so the integrated motion would  
 83 moderately follow the stimulus pattern. Thus, this subject would not follow the fast stimulus and shows a  
 84 weak correlation between performance accuracy and  $T_0$ .

85

86

### Supplementary Figure S7

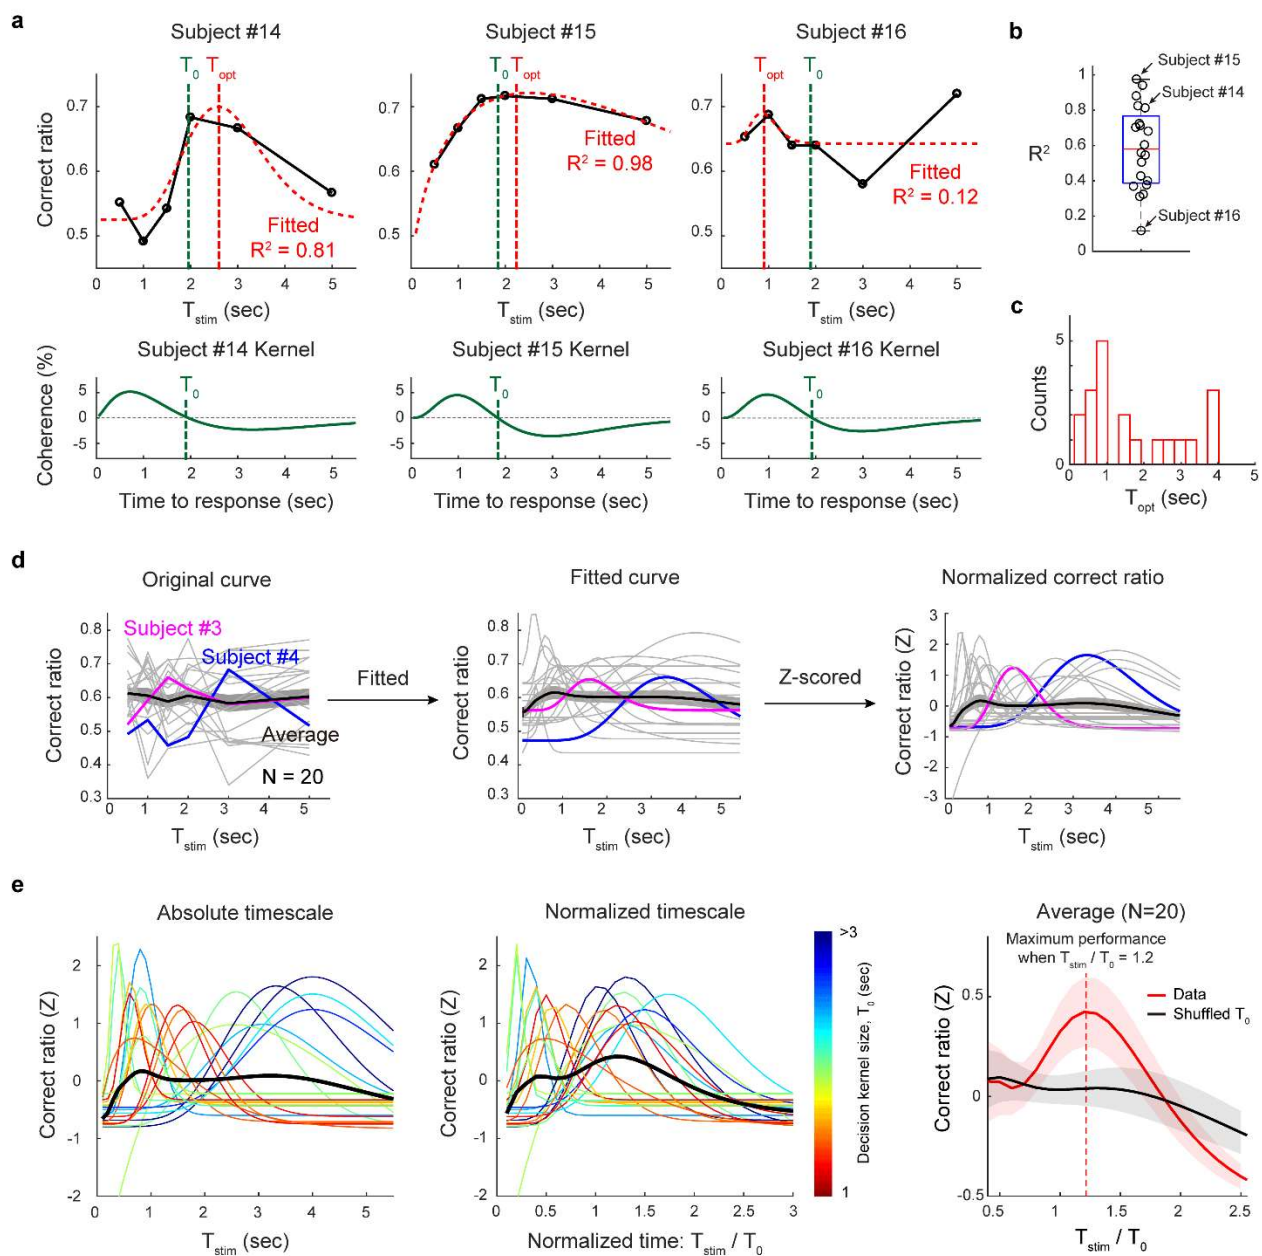

87

88 **Fig. S7. Optimized stimulation enhances the perceptual performance**

89 (a) Sample correct ratio curves and integration kernels from three subjects. Two sample correct ratio curves

## Supplementary material

90 of good fitting subjects (14 and 15) and the curve of the bad fitting subject (16) are shown (top).  $T_{opt}$  was  
91 defined as the peak position of the curve (red dashed line), and  $T_0$  of each subject was shown (green  
92 dashed line). (b) The goodness of fit. The coefficient of determination is shown in the boxplot; each circle  
93 denotes the individual  $R^2$ . (c) The distribution of  $T_{opt}$  was not biased toward the longest stimulus duration  
94 ( $T_{stim}=5$ ), but varied widely. (d) Normalization of the correct ratio curves. The original curve (left) was fit to  
95 an alpha function (middle) and Z-scored (right). (e) Correct ratio curve in absolute and normalized  
96 timescales. The color denotes the value of  $T_0$  in subjects. In a normalized time scale, the subjects had a  
97 similar trend. The population average showed maximum performance when  $T_{stim}/T_0 = 1.2$  (right, red). As a  
98 control, the same correct ratio curve was normalized with shuffled  $T_0$  of subjects (right, black). Shaded area  
99 denotes the standard error of the mean. A paired t-test at each time point showed that the grand average  
100 was significantly different from the control at  $T_{stim}/T_0 = 1 \sim 1.6$  ( $p < 0.05$ ,  $N=20$ ).

101

102

103

Supplimentary Figure S8

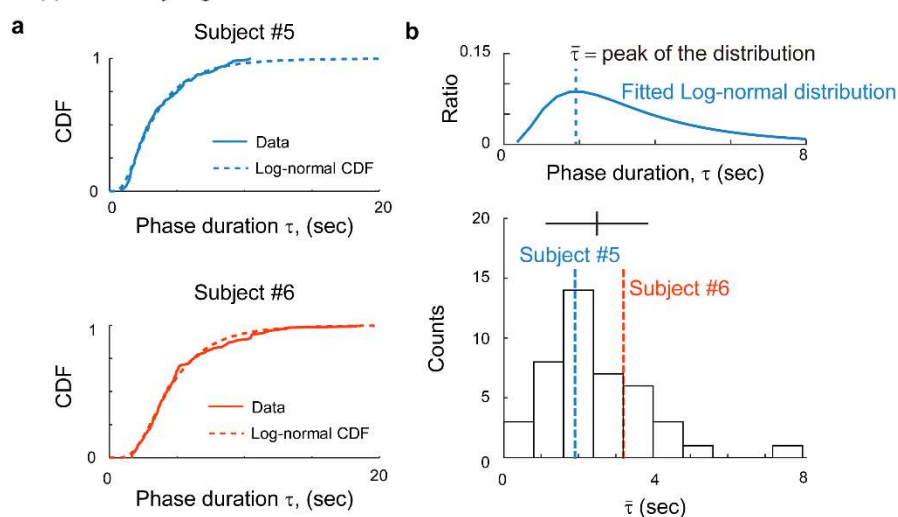

104

### 105 **Fig. S8. Quasi-periodic switching behavior statistics under the random bistable condition**

106 (a) The distribution of phase duration from two subjects. The  $\tau$  distribution was first converted to a  
107 cumulative density function and then fit to a log-normal distribution. All subject  $\tau$  distributions fit well to a  
108 log-normal distribution (Mean  $R^2 = 0.92$ , S.D. = 0.055), demonstrating that perceptual switching occurs in  
109 a quasi-periodic manner. (b) Histogram of individual  $\tau$  statistics. The peak value,  $\bar{\tau}$  varied from 0.5 to 8  
110 seconds, while 90% of the subject's  $\bar{\tau}$  values fell between 0.69 and 4.7 seconds. The population average  
111 and the standard deviation are shown with black solid lines.
